# Supplementary material for: Salivary ZG16B expression loss follows exocrine gland dysfunction related to oral chronic graft-versus-host disease
Source: PubMed Central journal article supplement — iScience. 2021 Dec 9;25(1):103592. doi: 10.1016/j.isci.2021.103592 (PMC8718990; doi:10.1016/j.isci.2021.103592), 2021-12-09
Supplement: mmc1.pdf [file mmc1.pdf]

**Supplemental information**

**Salivary ZG16B expression loss follows  
exocrine gland dysfunction related  
to oral chronic graft-versus-host disease**

**Ana Caroline Costa-da-Silva, Marit H. Aure, Joshua Dodge, Daniel Martin, Susan Dhamala, Monica Cho, Jeremy J. Rose, Carol W. Bassim, Kiran Ambatipudi, Frances T. Hakim, Steven Z. Pavletic, and Jacqueline W. Mays**

## SUPPLEMENTAL INFORMATION

**Table S1: Clinical characteristics of patients and healthy volunteers, Related to all Figures**

| Demographics                                                               | Discovery    |             |              | Validation   |             |             |             | scRNAseq    |
|----------------------------------------------------------------------------|--------------|-------------|--------------|--------------|-------------|-------------|-------------|-------------|
|                                                                            |              |             |              | Cohort 1     |             | Cohort 2    |             |             |
|                                                                            | unaffected   | affected    | HV           | unaffected   | affected    | unaffected  | affected    | HV          |
| Number of cases                                                            | 3            | 3           | 2            | 10           | 10          | 12          | 12          | 4           |
| Age at sample, yr, median (range)                                          | 64 (25-68)   | 50(50-53)   | 56 (49-63)   | 46.5 (26-56) | 57(27-67)   | 54 (19-68)  | 50 (20-68)  | 27 (24-34)  |
| Sex (F/M)                                                                  | 0/3          | 0/3         | 0/2          | 5/5          | 3/7         | 6/6         | 6/6         | 2/2         |
| Race (%)                                                                   |              |             |              |              |             |             |             |             |
| White, non-Hispanic                                                        | 2 (66.6)     | 3 (100)     | 2 (20)       | 8 (80)       | 10 (100)    | 12 (100)    | 10 (83.3)   | 2 (50)      |
| White, Hispanic                                                            | 1 (33.3)     |             |              | 1 (10)       |             |             | 1 (8.3)     | 1(25)       |
| African                                                                    |              |             |              |              |             |             | 1 (8.3)     | 1(25)       |
| Asian                                                                      |              |             |              | 1 (10)       |             |             |             |             |
| Time post-HSCT, months, median (range)                                     | 9 (3-20)     | 12(2-20)    | n/a          | 25.5(3-88)   | 11.5 (4-34) | 36 (5-137)  | 18 (8-68)   | n/a         |
| <b>Underlying Disease, n (%)</b>                                           |              |             |              |              |             |             |             |             |
| Lymphoma (HD/NHL)                                                          | -            | 2 (66.6)    | n/a          | 4 (40)       | 5 (50)      | 1 (8.3)     | 3 (25)      | n/a         |
| Acute leukemia (AML/ALL)                                                   | -            | -           | n/a          | 2 (20)       | 1 (10)      | 6 (50)      | 6 (50)      | n/a         |
| Chronic leukemia (CLL/CML)                                                 | 3 (100)      | 1 (33.3)    | n/a          | 2 (20)       | 4 (40)      | 2 (16.7)    | 1 (8.3)     | n/a         |
| MDS/myeloproliferative disorder (MDS, myelofibrosis, PV)                   | -            | -           | n/a          | 1 (10)       | -           | 1 (8.3)     | 1 (8.3)     | n/a         |
| Other                                                                      | -            | -           | n/a          | 1 (10)       | -           | 2 (16.8)    | 1 (8.3)     | n/a         |
| <b>Donor type, n (%)</b>                                                   |              |             |              |              |             |             |             |             |
| Related                                                                    | -            | -           | n/a          | 3 (30)       | -           | 5 (41.7)    | 5 (41.6)    | n/a         |
| Unrelated                                                                  | 3 (100)      | 3 (100)     | n/a          | 7 (70)       | 10 (100)    | 7 (58.3)    | 7 (58.3)    | n/a         |
| <b>HLA match, n (%)</b>                                                    |              |             |              |              |             |             |             |             |
| Matched                                                                    | 3 (100)      | 3 (100)     | n/a          | 9 (90)       | 8 (80)      | 11 (91.7)   | 9 (75)      | n/a         |
| Mismatched                                                                 | -            | -           | n/a          | 1 (10)       | 2 (20)      | 1 (8.3)     | 2 (16.7)    | n/a         |
| Haploidentical family donor                                                | -            | -           | n/a          | -            | -           | -           | 1 (8.3)     | n/a         |
| <b>Sex match (donor -&gt; recipient) , n (%)</b>                           |              |             |              |              |             |             |             |             |
| F → F                                                                      | -            | -           | n/a          | 5 (50)       | 1 (10)      | 3 (25)      | 3 (25)      | n/a         |
| F → M                                                                      | -            | 2 (66.7)    | n/a          | -            | 3 (30)      | -           | 3 (25)      | n/a         |
| M → M                                                                      | 3 (100)      | 1 (33.3)    | n/a          | 3 (30)       | 4 (40)      | 5 (41.7)    | 3 (25)      | n/a         |
| M → F                                                                      | -            | -           | n/a          | -            | 2 (20)      | 3 (25)      | 2 (16.7)    | n/a         |
| Not Available                                                              | -            | -           | n/a          | 2 (2)        | -           | 1 (8.3)     | 1 (8.3)     | n/a         |
| <b>Conditioning regimen , n (%)</b>                                        |              |             |              |              |             |             |             |             |
| Myeloablative (%)                                                          | 3 (100)      | 3 (100)     | n/a          | 9 (90)       | 10 (100)    | 7 (58.3)    | 6 (50)      | n/a         |
| Nonmyeloablative                                                           |              |             | n/a          |              |             |             | 4           | n/a         |
| History of TBI, n(%)                                                       | 3 (100)      | 3 (100)     | n/a          | 9 (90)       | 10 (100)    | 7 (58.3)    | 6 (50)      | n/a         |
| <b>Stem cell source , n (%)</b>                                            |              |             |              |              |             |             |             |             |
| PBSC                                                                       | 2 (66.7)     | 3 (100)     | n/a          | 10 (100)     | 10 (100)    | 11 (91.7)   | 9 (75)      | n/a         |
| Bone Marrow                                                                | 1 (33.3)     | -           | n/a          | -            | -           | 1 (8.3)     | 3 (25)      | n/a         |
| <b>History of aGVHD, yes, n (%)</b>                                        | 1 (33.3)     | 1 (33.3)    | n/a          | 4 (40)       | 6 (60)      | 8 (66.7)    | 8 (66.7)    | n/a         |
| Saliva production <sup>1</sup> , g, mean (±SD)                             | 2.13 (±0.99) | 1.4 (±0.86) | 4.32 (±0.86) | 2.37(±1.98)  | 2.4 (±1.31) | 2.12(±1.26) | 2.27(±1.38) | 3.78(±1.52) |
| <b>Systemic immunosuppressive treatment at time of saliva sample n (%)</b> |              |             |              |              |             |             |             |             |
| None                                                                       |              | 1 (33.3)    | 3 (100)      | 5 (50)       |             |             | 2 (16.7)    | 4 (100)     |
| Steroid                                                                    | 1 (33.3)     |             |              | 1 (10)       | 2 (20)      | 5 (42)      | 1 (8.3)     |             |
| Calcineurin/mTOR inhibitor                                                 |              | 2 (66.6)    |              | 3 (30)       | 4 (40)      | 5 (42)      | 3 (25)      |             |
| Calcineurin/mTOR inhibitor + Steroid                                       |              |             |              | 1 (10)       | 2 (20)      | 1 (8.3)     | 6 (50)      |             |
| Other                                                                      | 2 (66.6)     |             |              |              | 2 (20)      | 1 (8.3)     |             |             |

<sup>1</sup>Five-minute unstimulated whole saliva

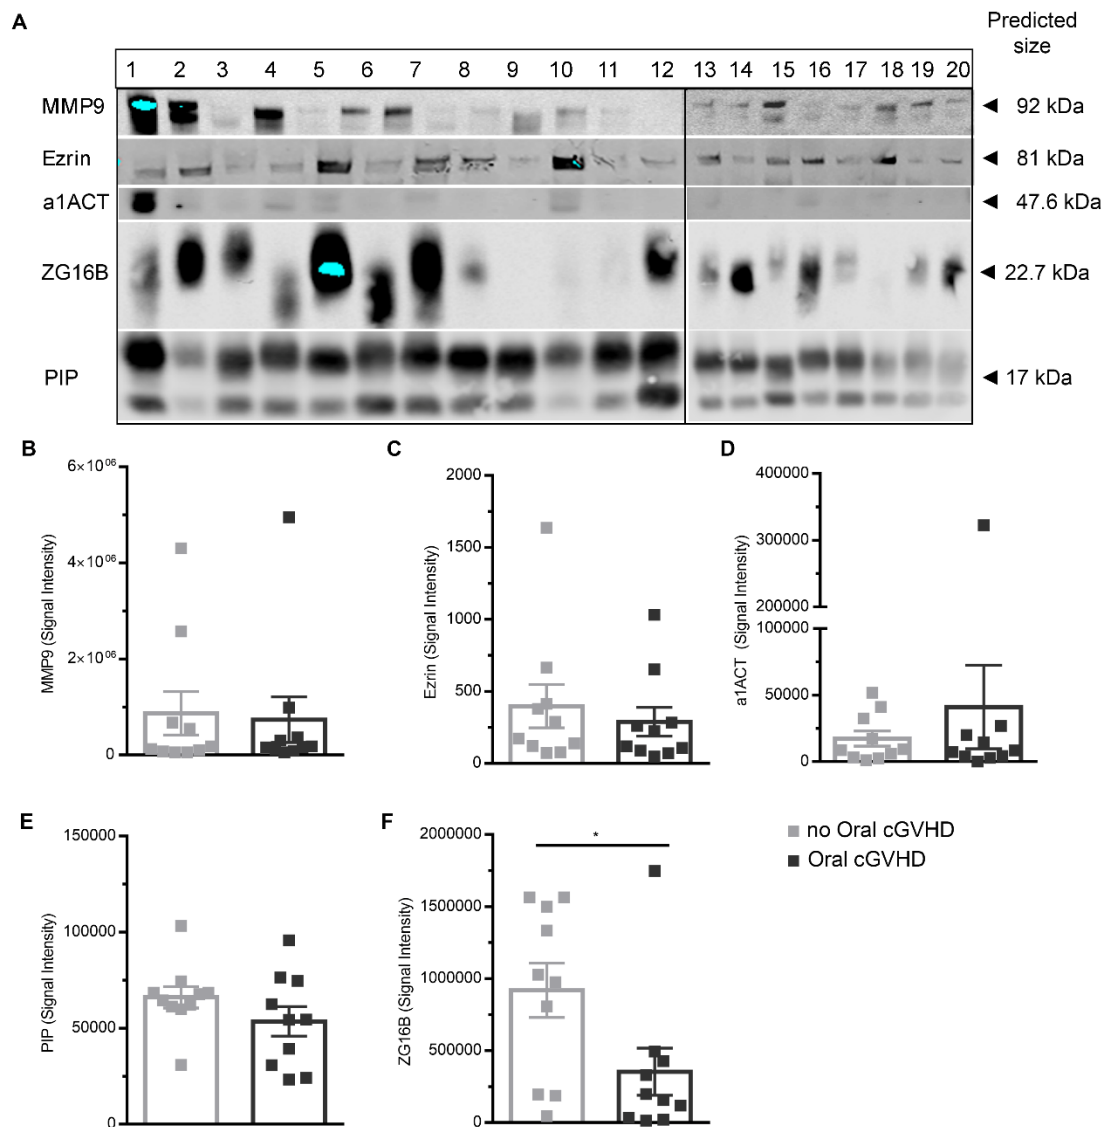

**Figure S1: WB Validation of the differentially expressed proteins in the saliva samples of Cohort 2, Related to Figure 2** (A) Quantitative WB analysis of MMP9 (predicted MW of ~ 92 kDa), Ezrin(predicted MW of ~ 81 kDa), a1ACT (predicted MW of ~ 47.6 kDa), and both glycosylated and nonglycosylated forms of ZG16B (predicted MW of ~ 22.7 kDa) and PIP (predicted MW of ~ 17 kDa) in individual saliva samples from post-HSCT patients with oral cGVHD (odd numbers) compared with non-affected post-HSCT patients (even numbers) of Cohort 2 was undertaken. Equal amounts of protein (10  $\mu$ g)

were loaded in each lane of the individual gels which are separated by the line (B) Densitometric analysis was performed using Image Studio Lite software (LiCor). Each dot represents 1 patient. Values are plotted as mean  $\pm$  SEM. Differences between groups were calculated using unpaired student's *t*-test with  $p \leq 0.05$  considered significant.

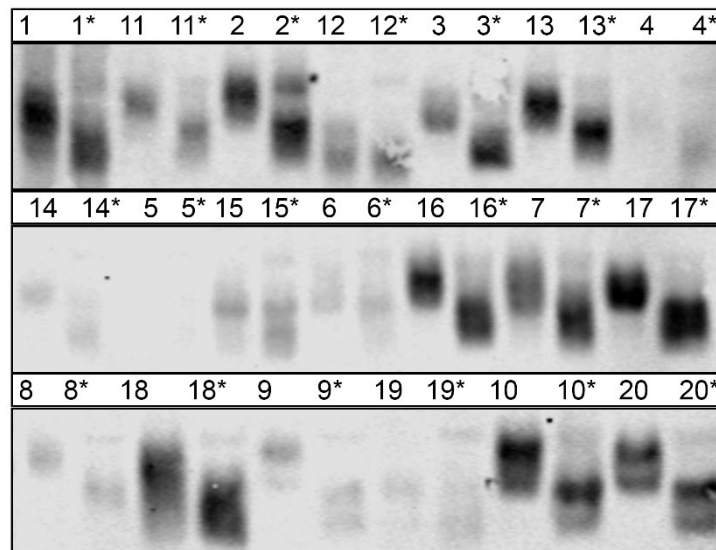

**Figure S2: WB analysis of PNGase F-treated (\*) and untreated saliva from post-HSCT patients with oral cGVHD (# 1-10) compared with non-affected post-HSCT patients (# 11-20) of cohort 2, Related to Figure 3.** A 5  $\mu$ g aliquot of ethanol-precipitated saliva, treated with or without PNGase F digestion, was loaded per lane and detected by anti-ZG16B WB. Untreated samples migrate differently at, typically, a higher apparent molecular weight. After PNGase F treatment, all samples migrate at the predicted molecular weight of  $\sim$ 22,7 kDa [UniProtKB – Q96DA0]. The asterisked numbers denote samples with PNGase treatment.

**Table S2: Summary of HV information and sequencing statistics, Related to Figure 4**

| <b>Samples</b> | <b>Age/Sex</b> | <b>N° of cells</b> | <b>Mean Reads/cell</b> | <b>Median genes/cell</b> | <b>N° of cells post filtering</b> |
|----------------|----------------|--------------------|------------------------|--------------------------|-----------------------------------|
| HV1            | 28/M           | 7707               | 14403                  | 912                      | 6747                              |
| HV2            | 26/M           | 7000               | 18387                  | 577                      | 6488                              |
| HV3            | 34/F           | 4124               | 32805                  | 1305                     | 3579                              |
| HV4            | 24/F           | 6978               | 20852                  | 756                      | 5600                              |

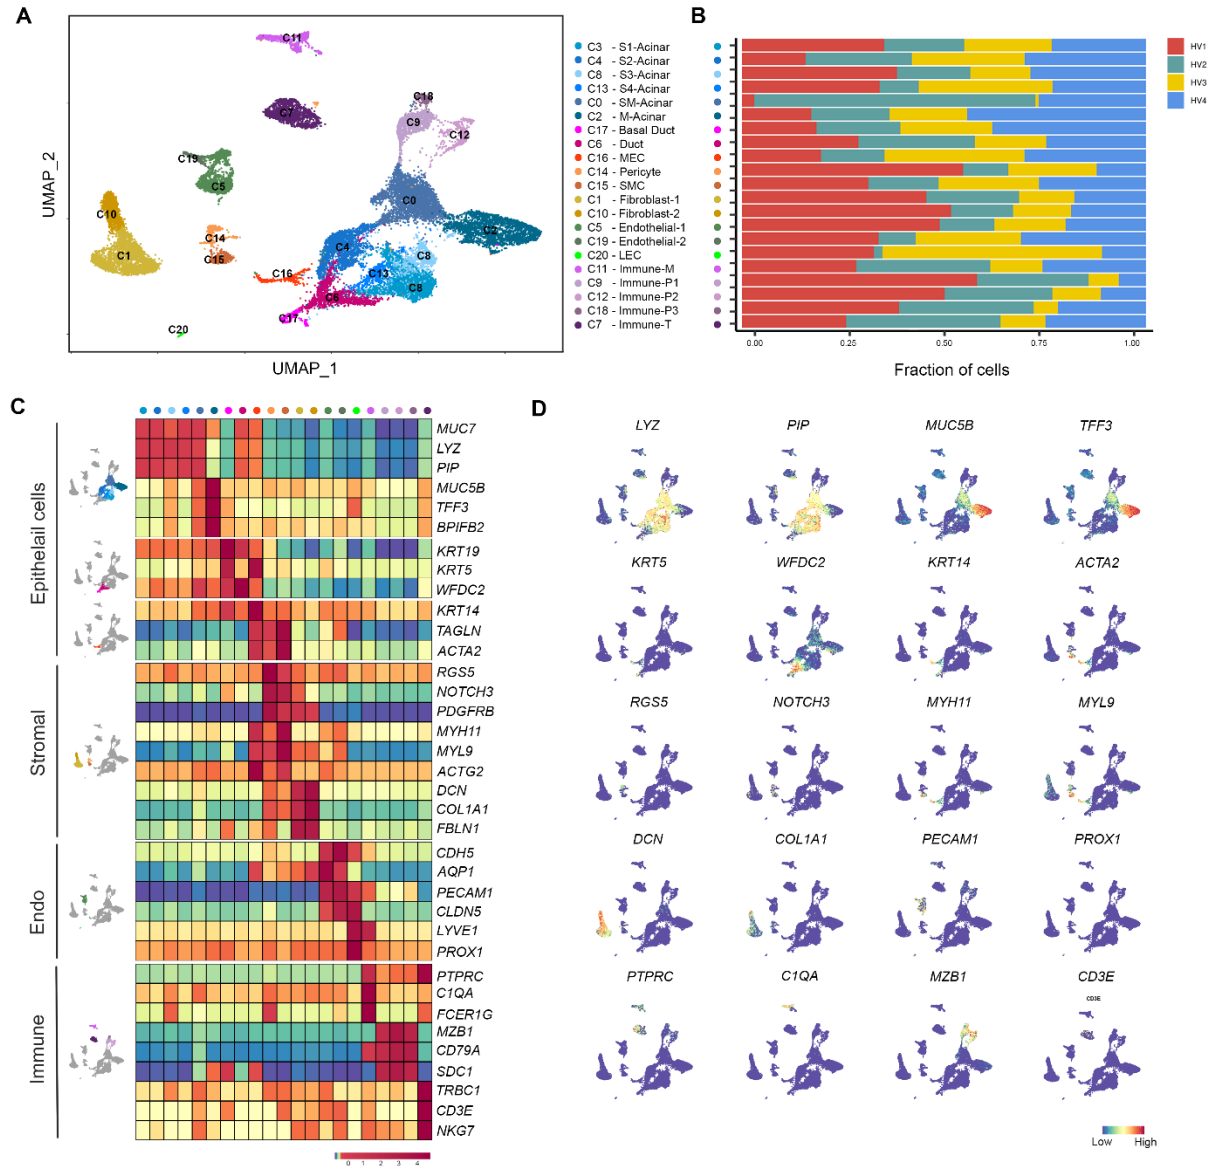

**Figure S3: Single-cell transcriptomic sequencing and clustering of healthy volunteer minor salivary gland cells, Related to Figure 4. (A)** UMAP embedding of data integrated from 4 HV MSG that were clustered into 20 populations and annotated according to expression of known marker genes. **(B)** Bar chart showing the fraction of cells from each sample in each of the 20 identified clusters. **(C)** UMAP projection plots colored by cell populations along with heatmaps of normalized gene expression of known markers used for their identification. **(D)** Feature plots illustrating the expression pattern

of selected makers genes of each cluster. Blue denotes minimal expression and red, high.  
MEC - Myoepithelial Cells; LEC – Lymphatic Endothelial Cells; SMC- Smooth Muscle  
Cells.

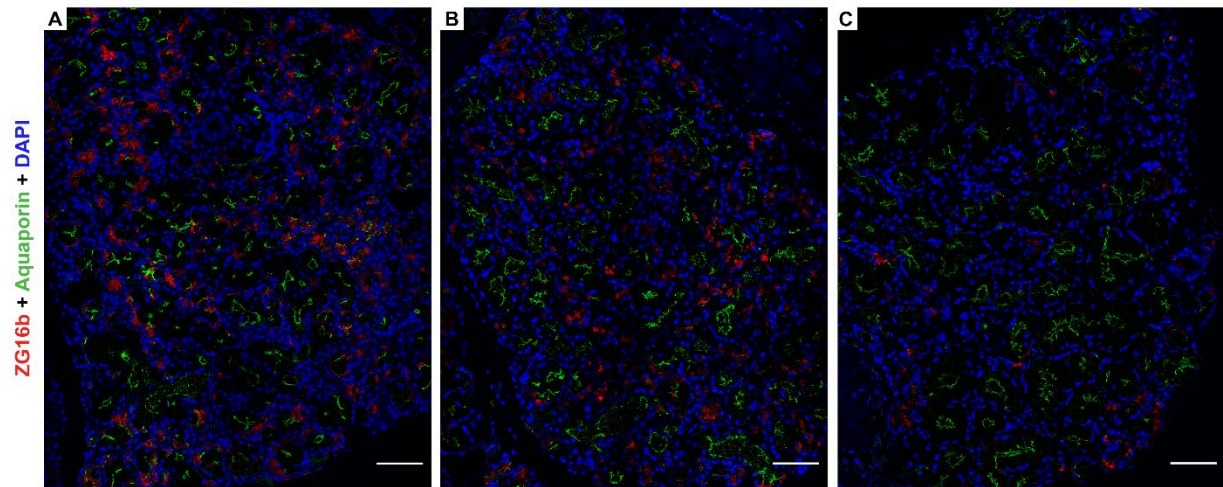

**Figure S4: Expanded images of ZG16B in the specimens shown within Figure 5A-C.** IHC staining highlights ZG16B (red) in the labial MSG of (A) a healthy volunteer, (B) a post-HSCT patient without oral cGVHD and (C) a post-HSCT patient with oral cGVHD. DAPI (blue) indicates nucleated cells and aquaporin 5 (green) labels the apical membrane of acinar cells. Magnification 400x, scale bars=200  $\mu$ m.

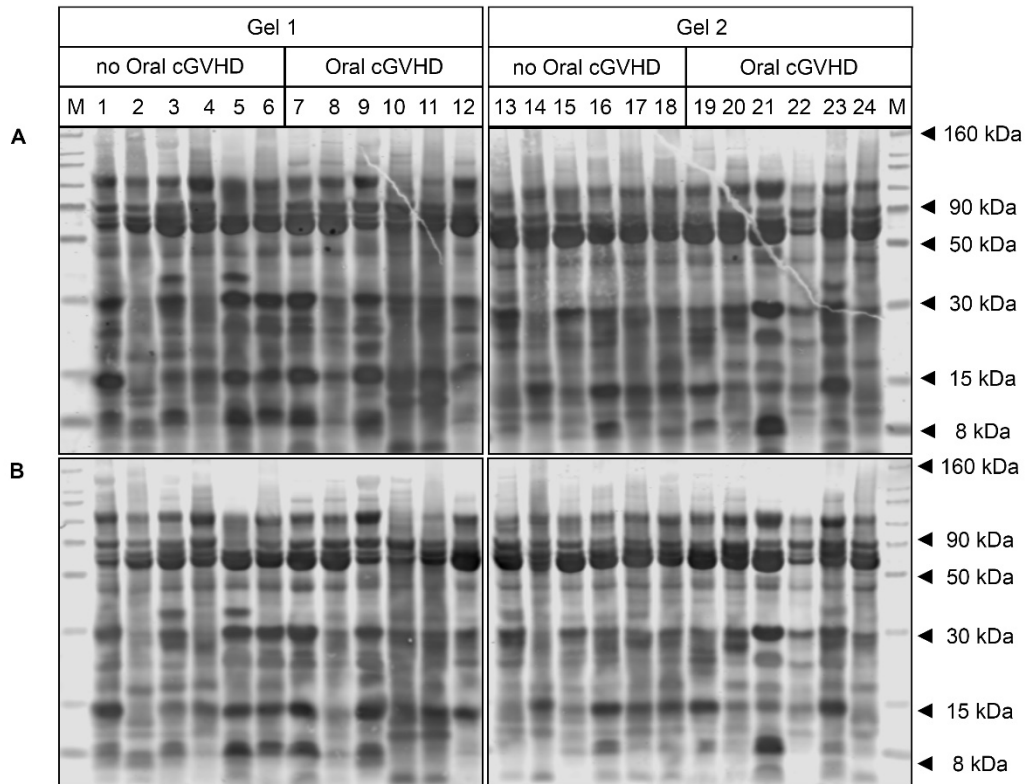

**Figure S5: Loading Controls for Immunoblots, Related to Figures 2 and 3.**

Nitrocellulose membranes stained with Revert® Total protein stain prior to western blotting to verify consistent protein loading and electrotransfer. (A) Membrane Figure 2A.

(B) Membrane Figure 3.
